# Supplementary material for: Prevalence and comorbidity of diabetes mellitus among non-institutionalized older adults in Germany - results of the national telephone health interview survey ‘German Health Update (GEDA)’ 2009
Source: PubMed Central journal article supplement (PMC3599814; doi:10.1186/1471-2458-13-166), 2013-02-23
Supplement: 1471-2458-13-166-S1.pdf [file 1471-2458-13-166-S1.pdf]

## Additional files

### Additional file 1

**National Telephone Health Interview Survey ‘German Health Update (GEDA)’ 2009 - Unweighted and weighted distribution of demographic characteristics as percentages in comparison with German census data\***

| <b>Characteristic (%)</b> | <b>GEDA 2009<br/>(Unweighted)</b> | <b>GEDA 2009<br/>(Weighted)</b> | <b>Microcensus 2007*</b> |
|---------------------------|-----------------------------------|---------------------------------|--------------------------|
| <b>Sex</b>                |                                   |                                 |                          |
| Men                       | 43.0                              | 48.5                            | 48.5                     |
| Women                     | 57.0                              | 51.5                            | 51.5                     |
| <b>Age group (years)</b>  |                                   |                                 |                          |
| 18-24                     | 11.4                              | 10.0                            | 10.0                     |
| 25-39                     | 22.4                              | 23.0                            | 23.0                     |
| 40-49                     | 23.2                              | 20.3                            | 20.3                     |
| 50-59                     | 17.4                              | 16.2                            | 16.2                     |
| 60-69                     | 14.2                              | 14.0                            | 14.0                     |
| 70+                       | 11.4                              | 16.4                            | 16.4                     |
| <b>Federal states</b>     |                                   |                                 |                          |
| Schleswig-Holstein        | 3.6                               | 3.4                             | 3.4                      |
| Hamburg                   | 2.3                               | 2.2                             | 2.2                      |
| Niedersachsen             | 10.1                              | 9.5                             | 9.5                      |
| Bremen                    | 0.9                               | 0.8                             | 0.8                      |
| Nordrhein-Westfalen       | 23.2                              | 21.6                            | 21.6                     |
| Hessen                    | 7.6                               | 7.4                             | 7.4                      |
| Rheinland-Pfalz           | 5.1                               | 4.9                             | 4.9                      |
| Baden-Württemberg         | 11.8                              | 12.9                            | 12.9                     |
| Bayern                    | 14.9                              | 15.0                            | 15.1                     |
| Saarland                  | 1.4                               | 1.3                             | 1.3                      |
| Berlin                    | 4.7                               | 4.3                             | 4.3                      |
| Brandenburg               | 3.2                               | 3.2                             | 3.2                      |
| Mecklenburg-Vorpommern    | 1.7                               | 2.1                             | 2.1                      |
| Sachsen                   | 4.5                               | 5.4                             | 5.4                      |
| Sachsen-Anhalt            | 2.4                               | 3.1                             | 3.1                      |
| Thüringen                 | 2.7                               | 2.9                             | 2.9                      |

\* Source: Microcensus 2007; Statistisches Bundesamt, Wiesbaden (<https://www.destatis.de/DE/Startseite.html>)
