# Supplementary material for: Prevalence and comorbidity of diabetes mellitus among non-institutionalized older adults in Germany - results of the national telephone health interview survey ‘German Health Update (GEDA)’ 2009
Source: PubMed Central journal article supplement (PMC3599814; doi:10.1186/1471-2458-13-166), 2013-02-23
Supplement: 1471-2458-13-166-S2.pdf [file 1471-2458-13-166-S2.pdf]

## Additional file 2

### National Telephone Health Interview Survey ‘German Health Update (GEDA)’ 2009 – Sex and age specific unweighted and weighted distribution of educational attainment (ISCED classification) as percentages in comparison with German census data\*

| Age group (years) | GEDA2009 (Unweighted) |        |      | GEDA2009 (Weighted) |        |      | Microcensus 2007* |        |      |  |
|-------------------|-----------------------|--------|------|---------------------|--------|------|-------------------|--------|------|--|
|                   | Primary               | Middle | High | Primary             | Middle | High | Primary           | Middle | High |  |
| <b>Men</b>        |                       |        |      |                     |        |      |                   |        |      |  |
| 18-24             | 36.3                  | 59.7   | 4.0  | 46.5                | 51.7   | 1.9  | 46.4              | 47.9   | 5.6  |  |
| 25-39             | 4.0                   | 53.6   | 42.4 | 13.4                | 59.9   | 26.7 | 13.4              | 52.2   | 34.4 |  |
| 40-49             | 3.2                   | 42.6   | 54.2 | 12.1                | 56.7   | 31.2 | 12.1              | 52.7   | 35.2 |  |
| 50-59             | 3.3                   | 43.1   | 53.6 | 11.8                | 56.4   | 31.8 | 11.8              | 54.4   | 33.9 |  |
| 60-69             | 2.3                   | 37.5   | 60.3 | 11.0                | 57.4   | 31.6 | 14.1              | 54.5   | 31.4 |  |
| 70+               | 4.4                   | 39.8   | 55.8 | 17.3                | 56.6   | 26.1 | 19.2              | 54.5   | 26.3 |  |
| <b>Women</b>      |                       |        |      |                     |        |      |                   |        |      |  |
| 18-24             | 36.6                  | 58.8   | 4.6  | 42.0                | 54.9   | 3.2  | 42.0              | 48.6   | 9.4  |  |
| 25-39             | 5.5                   | 56.8   | 37.7 | 15.9                | 58.7   | 25.4 | 15.8              | 48.6   | 35.6 |  |
| 40-49             | 4.9                   | 54.1   | 41.0 | 16.4                | 60.5   | 23.1 | 16.3              | 54.3   | 29.4 |  |
| 50-59             | 7.5                   | 51.9   | 40.6 | 21.7                | 58.2   | 20.2 | 21.6              | 55.9   | 22.5 |  |
| 60-69             | 10.5                  | 56.8   | 32.8 | 32.9                | 54.0   | 13.1 | 33.0              | 52.6   | 14.4 |  |
| 70+               | 24.0                  | 54.1   | 21.9 | 55.3                | 38.2   | 6.5  | 55.2              | 37.2   | 7.6  |  |

\* Source: Microcensus 2007; Statistisches Bundesamt, Wiesbaden (<https://www.destatis.de/DE/Startseite.html>)

ISCED: International Standard Classification of Education
