# Supplementary material for: Prevalence and comorbidity of diabetes mellitus among non-institutionalized older adults in Germany - results of the national telephone health interview survey ‘German Health Update (GEDA)’ 2009
Source: PubMed Central journal article supplement (PMC3599814; doi:10.1186/1471-2458-13-166), 2013-02-23
Supplement: 1471-2458-13-166-S3.pdf [file 1471-2458-13-166-S3.pdf]

### Additional file 3

**National Telephone Health Interview Survey ‘German Health Update (GEDA)’ 2009 - Sex and age specific unweighted and weighted prevalence of obesity (body mass index  $\geq 30 \text{ kg/m}^2$ ) and current smoking among persons 50 years of age and older in comparison with German census data\***

| Age group (years) | Prevalence of obesity (%) |                      |                   | Prevalence of current smoking (%) |                      |                   |
|-------------------|---------------------------|----------------------|-------------------|-----------------------------------|----------------------|-------------------|
|                   | GEDA 2009 (Unweighted)    | GEDA 2009 (Weighted) | Microcensus 2009* | GEDA 2009 (Unweighted)            | GEDA 2009 (Weighted) | Microcensus 2009* |
| <b>Men</b>        |                           |                      |                   |                                   |                      |                   |
| 50-59             | 19.8                      | 23.4                 | 20.3              | 33.2                              | 34.1                 | 33.8              |
| 60-69             | 21.0                      | 23.2                 | 21.8              | 20.8                              | 21.5                 | 20.6              |
| 70+               | 16.3                      | 20.1                 | 18.1              | 12.0                              | 12.5                 | 10.1              |
| <b>Women</b>      |                           |                      |                   |                                   |                      |                   |
| 50-59             | 17.4                      | 20.5                 | 17.1              | 28.0                              | 30.0                 | 25.3              |
| 60-69             | 18.3                      | 23.1                 | 19.5              | 15.7                              | 14.4                 | 13.6              |
| 70+               | 18.1                      | 21.2                 | 18.5              | 7.7                               | 7.1                  | 4.7               |

\* Source: Microcensus 2009; Statistisches Bundesamt, Wiesbaden 2011

<https://www.destatis.de/DE/Publikationen/Thematisch/Gesundheit/Gesundheitszustand/Rauchgewohnheiten.html>

<https://www.destatis.de/DE/Publikationen/Thematisch/Gesundheit/Gesundheitszustand/Koerpermasse.html>
